# Supplementary material for: Feasibility and accuracy of ED frailty identification in older trauma patients: a prospective multi-centre study
Source: PubMed Central journal article supplement (PMC8011126; doi:10.1186/s13049-021-00868-4), 2021-03-30
Supplement: 13049_2021_868_MOESM1_ESM.pdf [file 13049_2021_868_MOESM1_ESM.pdf]

CASE REPORT FORM

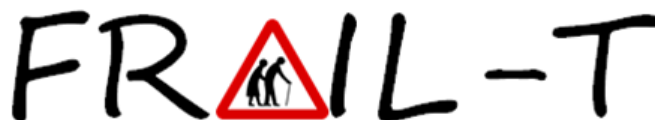

*The frailty in major trauma study*

Version 0.3

Date 26 12 2018

PARTICIPANT INITIALS

PARTICIPANT NUMBER /

Site / Participant number

DATE //

AGE

SEX FEMALE  MALE

ETHNICITY

|                                      | Code (circle) |
|--------------------------------------|---------------|
| Asian - any other Asian background   | 00            |
| Asian or Asian British - Bangladeshi | 01            |
| Asian or Asian British - Indian      | 02            |
| Asian or Asian British - Pakistanis  | 03            |
| Black - any other black background   | 04            |
| Black or Black British - African     | 05            |
| Black or Black British - Caribbean   | 06            |
| Mixed - any other mixed background   | 07            |
| Mixed - white and Asian              | 08            |
| Mixed - white and Black African      | 09            |
| Mixed - white and Black Caribbean    | 10            |
| Other - any other ethnic group       | 11            |
| Other - Chinese                      | 12            |
| Other - not known                    | 13            |
| Other - not stated                   | 14            |
| White - any other white background   | 15            |
| White - British                      | 16            |
| White - Irish                        | 17            |

PARTICIPANT INITIALS

PARTICIPANT NUMBER /

## CASE REPORT FORM

### INJURY AND CLINICAL CHARACTERISTICS

|                                                                                                                                                                                                             |                      |                                                                                                     |                      |
|-------------------------------------------------------------------------------------------------------------------------------------------------------------------------------------------------------------|----------------------|-----------------------------------------------------------------------------------------------------|----------------------|
| Date of ED attendance                                                                                                                                                                                       |                      | Time of ED attendance                                                                               |                      |
| <input type="checkbox"/> <input type="checkbox"/> / <input type="checkbox"/> <input type="checkbox"/> / <input type="checkbox"/> <input type="checkbox"/> <input type="checkbox"/> <input type="checkbox"/> |                      | (HH:MM): <input type="text"/>                                                                       |                      |
| Trauma call                                                                                                                                                                                                 |                      | Time of trauma team arrival                                                                         |                      |
| Yes / No                                                                                                                                                                                                    |                      | (HH:MM): <input type="text"/>                                                                       |                      |
| 'Code Red'                                                                                                                                                                                                  | Hospital trauma team | ED trauma team                                                                                      |                      |
| Date of traumatic injury                                                                                                                                                                                    |                      | Time of traumatic injury                                                                            |                      |
| <input type="checkbox"/> <input type="checkbox"/> / <input type="checkbox"/> <input type="checkbox"/> / <input type="checkbox"/> <input type="checkbox"/> <input type="checkbox"/> <input type="checkbox"/> |                      | (HH:MM): <input type="text"/>                                                                       |                      |
| Location of traumatic injury - postcode                                                                                                                                                                     |                      | Location of patient's home - postcode                                                               |                      |
| <input type="checkbox"/> <input type="checkbox"/> <input type="checkbox"/> <input type="checkbox"/>                                                                                                         |                      | <input type="checkbox"/> <input type="checkbox"/> <input type="checkbox"/> <input type="checkbox"/> |                      |
| Type of injury                                                                                                                                                                                              |                      | Blunt <input type="checkbox"/> Penetrating <input type="checkbox"/>                                 |                      |
| <b>Mechanism of Injury</b>                                                                                                                                                                                  | <b>Code (circle)</b> | <b>Mechanism of Injury</b>                                                                          | <b>Code (circle)</b> |
| Pedestrian vs vehicle                                                                                                                                                                                       | 01                   | Cycling incident                                                                                    | 12                   |
| Motorcycle vs other vehicle                                                                                                                                                                                 | 02                   | Sports injury                                                                                       | 13                   |
| Car vs stationary object                                                                                                                                                                                    | 03                   | Cyclist vs vehicle                                                                                  | 14                   |
| Car vs vehicle                                                                                                                                                                                              | 04                   | Motorcycle vs stationary object                                                                     | 15                   |
| Pedestrian vs motorcycle                                                                                                                                                                                    | 05                   | Hit by train/tram                                                                                   | 16                   |
| Pedestrian vs falling object                                                                                                                                                                                | 06                   | Crush injury                                                                                        | 17                   |
| Stabbing                                                                                                                                                                                                    | 07                   | Blast injury                                                                                        | 18                   |
| Fall from height                                                                                                                                                                                            | 08                   | Deliberate self-harm                                                                                | 19                   |
| Blunt assault                                                                                                                                                                                               | 09                   | Other                                                                                               | 20                   |
| Jump from height                                                                                                                                                                                            | 10                   | Fall <2m (e.g. low level fall from standing)                                                        | 21                   |
| Gunshot wound                                                                                                                                                                                               | 11                   |                                                                                                     |                      |

### ED VITAL SIGNS ON PRESENTATION (1<sup>ST</sup> SET OF ED OBSERVATIONS)

|                                |                                |      |
|--------------------------------|--------------------------------|------|
| Glasgow Coma Score (GCS)       | Systolic blood pressure (SBP): | mmHg |
| E:            V:            M: | Temperature:                   |      |
| Heart rate:                    | 1 <sup>st</sup> lactate:       |      |

PARTICIPANT INITIALS

PARTICIPANT NUMBER    /

**PAST MEDICAL HISTORY**

Comorbidities

| Region          | Comorbidity                                                             | Code (circle all that apply) |
|-----------------|-------------------------------------------------------------------------|------------------------------|
| Cardiac         | Angina, Arrhythmias, Heart failure, MI, Valve disease                   | 01                           |
| Vascular        | Stroke/TIA, Hypertension, Peripheral vascular disease                   | 02                           |
| Respiratory     | Asthma, COPD, emphysema                                                 | 03                           |
| Neurological    | Dementia, Hemiplegia/paraplegia, Degenerative disorders e.g. Parkinson  | 04                           |
| Endocrine       | Type 1 or Type 2 Diabetes                                               | 05                           |
| Renal           | Moderate or severe renal disease                                        | 06                           |
| GI              | GORD, GI ulceration, Inflammatory bowel diseases, Liver disease         | 07                           |
| Cancer/immunity | HIV/AIDS, Active cancer, Leukaemia, Lymphoma, Metastatic disease        | 08                           |
| MSK             | Rheumatoid or osteoarthritis, Osteoporosis, Connective tissue disorders | 09                           |
| Psychological   | Depression, Anxiety disorders, Bipolar disease, Schizophrenia/psychosis | 10                           |
| Substances      | Alcohol dependence, drug use, smoker                                    | 11                           |
| Senses          | Significant hearing or visual impairment                                | 12                           |
| Other           | Any other significant comorbidity (deemed by research or clinical team) | 13                           |

If other, please enter details:

Number of regular significant pre-injury medications (not paracetamol, lactulose for example)

|      |     |             |
|------|-----|-------------|
| None | 1-5 | More than 5 |
|------|-----|-------------|

Pre-admission residential status

|                                            | Code (circle) |
|--------------------------------------------|---------------|
| Homeless in night shelter                  | 00            |
| Homeless without accommodation             | 01            |
| Medical area                               | 02            |
| Not given; patient physically unable       | 03            |
| Not given; patient refused                 | 04            |
| Not known                                  | 05            |
| Own stable accommodation e.g. home or flat | 06            |
| Residential WITH routine nursing care      | 07            |
| Residential WITHOUT routine nursing care   | 08            |
| Warden controlled accommodation            | 09            |

Discharge location from ED

|                                           | Code (circle) |
|-------------------------------------------|---------------|
| Ward (under major trauma / surgical team) | 00            |
| Ward (under medical team)                 | 01            |
| Ward (under geriatric team)               | 02            |
| HDU                                       | 03            |
| ITU                                       | 04            |
| Died in ED                                | 05            |

PARTICIPANT INITIALS

PARTICIPANT NUMBER    /

**NURSE-LED FRAILTY ASSESSMENT**

|                                           |                                                                |
|-------------------------------------------|----------------------------------------------------------------|
| Initials of person completing assessments | <input type="text"/> <input type="text"/> <input type="text"/> |
|-------------------------------------------|----------------------------------------------------------------|

**CLINICAL FRAILTY SCALE (CFS)**

|                                                                                      |          |                          |                 |              |
|--------------------------------------------------------------------------------------|----------|--------------------------|-----------------|--------------|
| Are you able to fully complete this assessment? Circle                               | Yes      | No                       |                 |              |
| If no, please explain why not?                                                       |          |                          |                 |              |
| Where did you get the information to complete this assessment? Circle all that apply |          |                          |                 |              |
| Patient                                                                              | Relative | Pre-hospital information | Medical records | Own judgment |

Please circle the measurement on the scale below:

**Clinical Frailty Scale\***

-  **1 Very Fit** – People who are robust, active, energetic and motivated. These people commonly exercise regularly. They are among the fittest for their age.

---

-  **2 Well** – People who have **no active disease symptoms** but are less fit than category 1. Often, they exercise or are very **active occasionally**, e.g. seasonally.

---

-  **3 Managing Well** – People whose **medical problems are well controlled**, but are **not regularly active** beyond routine walking.

---

-  **4 Vulnerable** – While **not dependent** on others for daily help, often **symptoms limit activities**. A common complaint is being "slowed up", and/or being tired during the day.

---

-  **5 Mildly Frail** – These people often have **more evident slowing**, and need help in **high order IADLs** (finances, transportation, heavy housework, medications). Typically, mild frailty progressively impairs shopping and walking outside alone, meal preparation and housework.

---

-  **6 Moderately Frail** – People need help with **all outside activities** and with **keeping house**. Inside, they often have problems with stairs and need **help with bathing** and might need minimal assistance (cuing, standby) with dressing.

-  **7 Severely Frail** – **Completely dependent for personal care**, from whatever cause (physical or cognitive). Even so, they seem stable and not at high risk of dying (within ~ 6 months).

---

-  **8 Very Severely Frail** – Completely dependent, approaching the end of life. Typically, they could not recover even from a minor illness.

---

-  **9. Terminally Ill** - Approaching the end of life. This category applies to people with a **life expectancy <6 months**, who are **not otherwise evidently frail**.

**Scoring frailty in people with dementia**

The degree of frailty corresponds to the degree of dementia. Common **symptoms in mild dementia** include forgetting the details of a recent event, though still remembering the event itself, repeating the same question/story and social withdrawal.

In **moderate dementia**, recent memory is very impaired, even though they seemingly can remember their past life events well. They can do personal care with prompting.

In **severe dementia**, they cannot do personal care without help.

\* 1. Canadian Study on Health & Aging Revised 2008.  
 2. K. Rockwood et al. A global clinical measure of fitness and frailty in elderly people. CMAJ 2005;173:489-495.

© 2007-2009 Version 1.2. All rights reserved. Geriatric Medicine Research, Dalhousie University, Halifax, Canada. Permission granted to copy for research and educational purposes only.

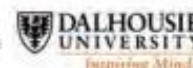

PARTICIPANT INITIALS

PARTICIPANT NUMBER    /

PRISMA-7

|                                                                                      |          |                          |                 |              |
|--------------------------------------------------------------------------------------|----------|--------------------------|-----------------|--------------|
| Are you able to fully complete this assessment? Circle                               |          | Yes                      | No              |              |
| If no, please explain why not?                                                       |          |                          |                 |              |
| Where did you get the information to complete this assessment? Circle all that apply |          |                          |                 |              |
| Patient                                                                              | Relative | Pre-hospital information | Medical records | Own judgment |

**PRISMA-7 Questionnaire**

| PATIENT QUESTIONS                                                                         |                              |                             |
|-------------------------------------------------------------------------------------------|------------------------------|-----------------------------|
| 1. Are you older than 85 years?                                                           | Yes <input type="checkbox"/> | No <input type="checkbox"/> |
| 2. Are you male?                                                                          | Yes <input type="checkbox"/> | No <input type="checkbox"/> |
| 3. In general, do you have any health problems that require you to limit your activities? | Yes <input type="checkbox"/> | No <input type="checkbox"/> |
| 4. Do you need someone to help you on a regular basis?                                    | Yes <input type="checkbox"/> | No <input type="checkbox"/> |
| 5. In general, do you have any health problems that require you to stay at home?          | Yes <input type="checkbox"/> | No <input type="checkbox"/> |
| 6. If you need help, can you count on someone close to you?                               | Yes <input type="checkbox"/> | No <input type="checkbox"/> |
| 7. Do you regularly use a stick, walker or wheelchair to move about?                      | Yes <input type="checkbox"/> | No <input type="checkbox"/> |
| <b>Total checked:</b>                                                                     |                              | _____                       |

**► Instructions:**

- For questions 3 through 7, do not interpret the answer; simply note the person’s answer without considering whether or not it should be “yes” or “no”.
- If the respondent hesitates between “yes” and “no”, ask him/her to choose one of the two answers.
- If, despite several attempts, he/she persists in answering “a little” or “at times”, enter “yes”.

**SCORING: If the respondent had 3 or more “yes” answers, this indicates an increased risk of frailty and the need for further clinical review.**

PARTICIPANT INITIALS

PARTICIPANT NUMBER /

15 VARIABLE TRAUMA SPECIFIC FRAILITY INDEX

|                                                                                      |          |                          |                 |              |
|--------------------------------------------------------------------------------------|----------|--------------------------|-----------------|--------------|
| Are you able to fully complete this assessment? Circle                               |          | Yes                      | No              |              |
| If no, please explain why not?                                                       |          |                          |                 |              |
| Where did you get the information to complete this assessment? Circle all that apply |          |                          |                 |              |
| Patient                                                                              | Relative | Pre-hospital information | Medical records | Own judgment |

Please score each line (number in brackets) on the measurement to produce a total score.

|                                                          |                |                       |           |
|----------------------------------------------------------|----------------|-----------------------|-----------|
| <b>Comorbidities</b>                                     |                |                       |           |
| Cancer history                                           | Yes (1)        | No (0)                |           |
| Coronary Heart Disease<br>(more than one score possible) | MI (1)         | CABG (0.75)           |           |
|                                                          | PCI (0.5)      | Medication (0.25)     |           |
| Dementia                                                 | Severe (1)     | Moderate (0.5)        |           |
|                                                          |                |                       |           |
| <b>Daily activities</b>                                  |                |                       |           |
| Help with grooming                                       | Yes (1)        | No (0)                |           |
| Help with managing money                                 | Yes (1)        | No (0)                |           |
| Help doing household work                                | Yes (1)        | No (0)                |           |
| Help toileting                                           | Yes (1)        | No (0)                |           |
| Help walking                                             | Wheelchair (1) | Walker / frame (0.75) |           |
|                                                          | Cane (0.25)    | No (0)                |           |
| <b>Health Attitude</b>                                   |                |                       |           |
| Feel less useful                                         | Most time (1)  | Sometimes (0.5)       | Never (0) |
| Feel sad                                                 | Most time (1)  | Sometimes (0.5)       | Never (0) |
| Feel effort to do everything                             | Most time (1)  | Sometimes (0.5)       | Never (0) |
| Falls                                                    | Most time (1)  | Sometimes (0.5)       | Never (0) |
| Feel lonely                                              | Most time (1)  | Sometimes (0.5)       | Never (0) |
| <b>Function</b>                                          |                |                       |           |
|                                                          | No (1)         | Yes (0)               |           |
| <b>Nutrition</b>                                         |                |                       |           |
| Albumin                                                  | < 30 g/L (1)   | > 30 g/L (0)          |           |

TOTAL \_\_\_\_\_

PARTICIPANT INITIALS

PARTICIPANT NUMBER    /

**NURSE-LED FRAILTY ASSESSMENT - EVALUATION OF TOOLS**

|                                                                                          |                                                                   |                                                     |                                                                          |
|------------------------------------------------------------------------------------------|-------------------------------------------------------------------|-----------------------------------------------------|--------------------------------------------------------------------------|
| Please rank the tools from <b>best to worst</b> .<br>1 = best<br>2 = middle<br>3 = worst | <p align="center"><b>Clinical Frailty Scale</b></p> Number: _____ | <p align="center"><b>PRISMA-7</b></p> Number: _____ | <p align="center"><b>Trauma Specific Frailty Index</b></p> Number: _____ |
|------------------------------------------------------------------------------------------|-------------------------------------------------------------------|-----------------------------------------------------|--------------------------------------------------------------------------|

|                                                                                    | Clinical Frailty Scale                                                                                                                                                             | PRISMA-7                                                                                                                                                                           | Trauma Specific Frailty Index                                                                                                                                                      |
|------------------------------------------------------------------------------------|------------------------------------------------------------------------------------------------------------------------------------------------------------------------------------|------------------------------------------------------------------------------------------------------------------------------------------------------------------------------------|------------------------------------------------------------------------------------------------------------------------------------------------------------------------------------|
| For each tool, please circle the <b>number (rating)</b> most applies for each tool | 5 = extremely easy to complete<br><br>4 = somewhat easy to complete<br><br>3 = neither easy nor hard to complete<br><br>2 = hard to complete<br><br>1 = extremely hard to complete | 5 = extremely easy to complete<br><br>4 = somewhat easy to complete<br><br>3 = neither easy nor hard to complete<br><br>2 = hard to complete<br><br>1 = extremely hard to complete | 5 = extremely easy to complete<br><br>4 = somewhat easy to complete<br><br>3 = neither easy nor hard to complete<br><br>2 = hard to complete<br><br>1 = extremely hard to complete |

PARTICIPANT INITIALS

PARTICIPANT NUMBER

GERIATRICIAN ASSESSMENT WITHIN 72 HOURS

|                                                                |                                                                            |   |                                                                            |            |                                                                                                     |
|----------------------------------------------------------------|----------------------------------------------------------------------------|---|----------------------------------------------------------------------------|------------|-----------------------------------------------------------------------------------------------------|
| Date of assessment                                             | <input type="checkbox"/> <input type="checkbox"/> <input type="checkbox"/> | / | <input type="checkbox"/> <input type="checkbox"/> <input type="checkbox"/> | /          | <input type="checkbox"/> <input type="checkbox"/> <input type="checkbox"/> <input type="checkbox"/> |
| Designation of geriatrician completing assessment. Circle      |                                                                            |   | ST3 +                                                                      | Consultant |                                                                                                     |
| Was frailty present in this patient's pre-trauma state? Circle |                                                                            |   | Yes                                                                        | No         |                                                                                                     |

Please circle the measurement on the scale below:

Clinical Frailty Scale\*

-  **1 Very Fit** – People who are robust, active, energetic and motivated. These people commonly exercise regularly. They are among the fittest for their age.

---

-  **2 Well** – People who have **no active disease symptoms** but are less fit than category 1. Often, they exercise or are very **active occasionally**, e.g. seasonally.

---

-  **3 Managing Well** – People whose **medical problems are well controlled**, but are **not regularly active** beyond routine walking.

---

-  **4 Vulnerable** – While **not dependent** on others for daily help, often **symptoms limit activities**. A common complaint is being "slowed up", and/or being tired during the day.

---

-  **5 Mildly Frail** – These people often have **more evident slowing**, and need help in **high order IADLs** (finances, transportation, heavy housework, medications). Typically, mild frailty progressively impairs shopping and walking outside alone, meal preparation and housework.

---

-  **6 Moderately Frail** – People need help with **all outside activities** and with **keeping house**. Inside, they often have problems with stairs and need **help with bathing** and might need minimal assistance (cuing, standby) with dressing.

-  **7 Severely Frail** – **Completely dependent for personal care**, from whatever cause (physical or cognitive). Even so, they seem stable and not at high risk of dying (within ~ 6 months).

---

-  **8 Very Severely Frail** – Completely dependent, approaching the end of life. Typically, they could not recover even from a minor illness.

---

-  **9. Terminally Ill** - Approaching the end of life. This category applies to people with a **life expectancy <6 months**, who are **not otherwise evidently frail**.

Scoring frailty in people with dementia

The degree of frailty corresponds to the degree of dementia. Common **symptoms in mild dementia** include forgetting the details of a recent event, though still remembering the event itself, repeating the same question/story and social withdrawal. In **moderate dementia**, recent memory is very impaired, even though they seemingly can remember their past life events well. They can do personal care with prompting. In **severe dementia**, they cannot do personal care without help.

\* 1. Canadian Study on Health & Aging Revised 2008.  
2. K. Rockwood et al. A global clinical measure of fitness and frailty in elderly people. CMAJ 2005;173:489-495.

© 2007-2009 Version 1.2. All rights reserved. Geriatric Medicine Research, Dalhousie University, Halifax, Canada. Permission granted to copy for research and educational purposes only.

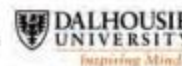



PARTICIPANT INITIALS

PARTICIPANT NUMBER    /

**OUTCOMES & FOLLOW UP: ON DISCHARGE FROM HOSPITAL**

The Abbreviated Injury Scale. (AIS) Maximum AIS for region:

|                                       |  |
|---------------------------------------|--|
| AIS Head and neck                     |  |
| AIS Face                              |  |
| AIS Thorax                            |  |
| AIS Abdo/pelvic contents/lumbar spine |  |
| AIS extremity/bony pelvis             |  |
| AIS external                          |  |
| ISS                                   |  |

|                                                                                                                                                                             |                                                                                     |
|-----------------------------------------------------------------------------------------------------------------------------------------------------------------------------|-------------------------------------------------------------------------------------|
| Date of discharge or death                                                                                                                                                  | Did the patient die?                                                                |
| <input type="text"/> <input type="text"/> / <input type="text"/> <input type="text"/> / <input type="text"/> <input type="text"/> <input type="text"/> <input type="text"/> | Yes / No                                                                            |
| Critical Care admission (L3) – length of stay (days)                                                                                                                        | Critical Care admission (L2) – length of stay (days)                                |
| <input type="text"/> <input type="text"/> <input type="text"/> <input type="text"/>                                                                                         | <input type="text"/> <input type="text"/> <input type="text"/> <input type="text"/> |
| Total length of stay (days)                                                                                                                                                 |                                                                                     |
| <input type="text"/> <input type="text"/> <input type="text"/> <input type="text"/>                                                                                         |                                                                                     |

**DISCHARGE DESTINATION**

|                                             | Code (circle) |
|---------------------------------------------|---------------|
| Same as previous (usual place of residence) | 00            |
| Homeless without accommodation              | 01            |
| Medical area (other hospital)               | 02            |
| Medical area (rehabilitation facility)      | 03            |
| Not given; patient physically unable        | 04            |
| Not given; patient refused                  | 05            |
| Not known                                   | 06            |
| Own stable accommodation e.g. home or flat  | 07            |
| Residential WITH routine nursing care       | 08            |
| Residential WITHOUT routine nursing care    | 09            |
| Warden controlled accommodation             | 10            |

PARTICIPANT INITIALS

PARTICIPANT NUMBER /

EQ-5D-5L

Date of completion

//

Under each heading, please tick the **ONE** box that best describes your health **TODAY**

**MOBILITY**

- I have no problems in walking about
- I have slight problems in walking about
- I have moderate problems in walking about
- I have severe problems in walking about
- I am unable to walk about

**SELF-CARE**

- I have no problems washing or dressing myself
- I have slight problems washing or dressing myself
- I have moderate problems washing or dressing myself
- I have severe problems washing or dressing myself
- I am unable to wash or dress myself

**USUAL ACTIVITIES** (*e.g. work, study, housework, family or leisure activities*)

- I have no problems doing my usual activities
- I have slight problems doing my usual activities
- I have moderate problems doing my usual activities
- I have severe problems doing my usual activities
- I am unable to do my usual activities

**PAIN / DISCOMFORT**

- I have no pain or discomfort
- I have slight pain or discomfort
- I have moderate pain or discom
- I have severe pain or discomfort
- I have extreme pain or discomfort

**ANXIETY / DEPRESSION**

- I am not anxious or depressed
- I am slightly anxious or depressed
- I am moderately anxious or depressed
- I am severely anxious or depressed
- I am extremely anxious or depressed

PARTICIPANT INITIALS

PARTICIPANT NUMBER    /

EQ-5D-5L

- We would like to know how good or bad your health is TODAY.
- This scale is numbered from 0 to 100.
- 100 means the best health you can imagine.  
0 means the worst health you can imagine.
- Mark an X on the scale to indicate how your health is TODAY.
- Now, please write the number you marked on the scale in the box below.

YOUR HEALTH TODAY =

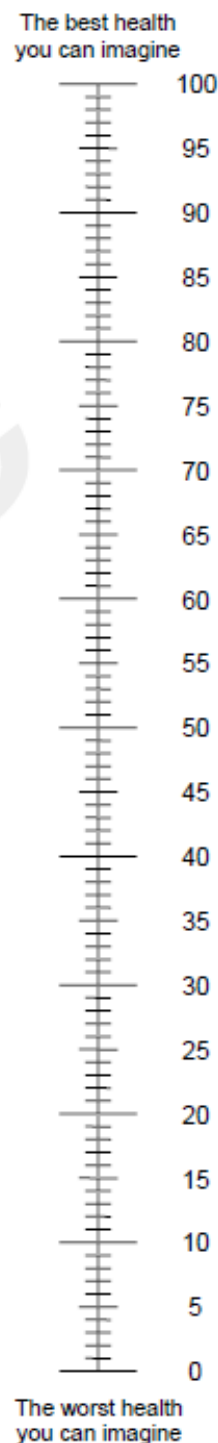

END OF CRF

PLEASE ENTER DATA INTO REDcap ([web address](#))
